# Supplementary material for: Analysing breast cancer survivors’ acceptance profiles for using an electronic pillbox connected to a smartphone application using Seintinelles, a French community-based research tool
Source: Frontiers journal article supplement (doi:10.3389/fphar.2022.889695), 2022-09-27
Supplement: Data_Sheet_3.pdf [file Data_Sheet_3.pdf]

## Appendix 3 – Structure and definitions used in the e-survey

### **Online questionnaire structure**

| E-survey structure of sections           | Variables asked within sections                                                                                                                                                                                                                                                                                   |
|------------------------------------------|-------------------------------------------------------------------------------------------------------------------------------------------------------------------------------------------------------------------------------------------------------------------------------------------------------------------|
| I. Sociodemographic characteristics      | <ul style="list-style-type: none"><li>• Age</li><li>• Marital status</li><li>• Children</li><li>• Educational level</li><li>• Professional status</li><li>• Financial situation</li></ul>                                                                                                                         |
| II. Health status and disease experience | <ul style="list-style-type: none"><li>• General health status</li><li>• Medication intake for other chronic diseases</li><li>• Quality of Life</li><li>• Year of diagnosis</li><li>• Disease impact on life</li><li>• Power to control disease</li><li>• Disease knowledge</li><li>• Disease recurrence</li></ul> |

|                                                   |                                                                                                                                                                                                                                                                                                                                                                                                                                                                 |
|---------------------------------------------------|-----------------------------------------------------------------------------------------------------------------------------------------------------------------------------------------------------------------------------------------------------------------------------------------------------------------------------------------------------------------------------------------------------------------------------------------------------------------|
| III. Medication adherence                         | <ul style="list-style-type: none"> <li>● OHT adherence</li> <li>● Motivation for OHT adherence/non-adherence</li> <li>● Side effect management</li> <li>● OHT management</li> <li>● The implication of physicians in OHT adherence</li> <li>● Satisfaction of information given by physician regarding <ul style="list-style-type: none"> <li>○ The nature of the treatment</li> <li>○ Potential health benefits</li> <li>○ Side-effects</li> </ul> </li> </ul> |
| IV. eHealth utilisation                           | <ul style="list-style-type: none"> <li>● Possession of wearables/ health applications</li> <li>● Utilisation frequency</li> <li>● Reasons for use</li> <li>● Important solutions for OHT management</li> </ul>                                                                                                                                                                                                                                                  |
| Medication adherence enhancing technology eHealth | <ul style="list-style-type: none"> <li>● Barrier to usability and acceptability</li> <li>● Facilitations of usability and acceptability</li> </ul>                                                                                                                                                                                                                                                                                                              |
